# 1 Loop-extrusion and polymer phase-separation can co- 2 exist at the single-molecule level to shape chromatin 3 folding

4 Mattia Conte<sup>1\*</sup>, Ehsan Irani<sup>2,3\*</sup>, Andrea M. Chiariello<sup>1\*</sup>, Alex Abraham<sup>1</sup>, Simona Bianco<sup>2</sup>,  
5 Andrea Esposito<sup>1</sup>, Mario Nicodemi<sup>1,2,3,§</sup>

6

7 <sup>1</sup>Dipartimento di Fisica, Università di Napoli *Federico II*, and INFN Napoli, Complesso Universitario di Monte  
8 Sant'Angelo, 80126 Naples, Italy.

9 <sup>2</sup>Berlin Institute for Medical Systems Biology, Max-Delbrück Centre (MDC) for Molecular Medicine, Berlin,  
10 Germany.

11 <sup>3</sup>Berlin Institute of Health (BIH), MDC-Berlin, Germany.

12 \* Equal contribution.

13 § Lead contact: [mario.nicodemi@na.infn.it](mailto:mario.nicodemi@na.infn.it)

14

## 15 Abstract

16 Loop-extrusion and phase-separation have been proposed as mechanisms that shape  
17 chromosome large-scale spatial organization. It is unclear, however, how they perform  
18 relative to each other in explaining chromatin architecture data and whether they compete  
19 or co-exist at the single-molecule level. Here, we compare models of polymer physics based  
20 on loop-extrusion and phase-separation, as well as models where both mechanisms act  
21 simultaneously in a single molecule, against multiplexed FISH data available in human loci in  
22 IMR90 and HCT116 cells. We find that the different models recapitulate bulk Hi-C and average  
23 microscopy data. Single-molecule chromatin conformations are also well captured, especially  
24 by phase-separation based models that better reflect the experimentally reported  
25 segregation in globules of the considered genomic loci and their cell-to-cell structural  
26 variability. Such a variability is consistent with two main concurrent causes: single-cell  
27 epigenetic heterogeneity and an intrinsic thermodynamic conformational degeneracy of  
28 folding. Overall, the model combining loop-extrusion and polymer phase-separation provides  
29 a very good description of the data, particularly higher-order contacts, showing that the two  
30 mechanisms can co-exist in shaping chromatin architecture in single cells.

31

## 32 INTRODUCTION

33 To understand the machinery that in the nucleus of cells establishes at large scales the 3-  
34 dimensional (3D) architecture of chromatin<sup>1-14</sup>, encompassing DNA loops<sup>15</sup>, Topologically  
35 Associated Domains (TADs)<sup>16,17</sup> and other structures<sup>13,18</sup>, different physical mechanisms have  
36 been proposed and investigated via models relying solely on fundamental physical  
37 processes<sup>19-45</sup> and via computational approaches<sup>46-59</sup>. However, it remains unclear how well  
38 different mechanisms capture folding at the single molecule level, how they compare against  
39 each other in explaining experimental data and whether they compete or co-exist in  
40 determining the structure of chromosomes. Here, we explore two recently discussed classes  
41 of models that focus on two distinct physical mechanisms, respectively loop-extrusion and  
42 polymer phase-separation, that we compare against single-molecule super-resolution  
43 microscopy<sup>6</sup> and bulk Hi-C data<sup>15,60</sup> available in human loci in IMR90 and HCT116 cells.

44  
45 Loop-extrusion and phase-separation based polymer models of chromosomes reflect two  
46 classical, yet distinct scenarios of molecular biology to explain the formation of DNA  
47 contacts<sup>61</sup>. The first class considers the picture where physical proximity between distal sites  
48 is established by molecular motors that bind to DNA and extrude a loop<sup>19,20,31,39,40</sup>. This is an  
49 out-of-equilibrium, active physical process that involves energy, e.g., ATP, consumption. The  
50 model envisages that those loop-extruding complexes stochastically bind to a polymer chain  
51 and extrude loops until encountering another motor, an anchor site or unbinding from the  
52 chain. While the polymer becomes compacted in a linear array of loops, specific contacts are  
53 established between the motor anchor sites where extrusion halts, hence defining  
54 boundaries between subsequent chromatin regions. Experimental evidence indicates that  
55 Cohesin and Condensin can be components of the motor complex, while properly oriented  
56 CTCF sites can act as anchor points<sup>40</sup>. Computer simulations have shown that such a model  
57 can explain with good accuracy loops and TADs visible in bulk Hi-C contact maps in interphase  
58 as well as, for example, in mitotic chromosomes<sup>19,20,31,39,40</sup>. Variants of such a model have  
59 been also developed where chromatin loops are formed by thermal random sliding of DNA  
60 into an extruding molecule<sup>31</sup> or by, e.g., transcription-induced supercoiling<sup>39</sup>.

61  
62 The second class of polymer models<sup>21-30,32-38,41-45</sup> considers another classical scenario where  
63 physical proximity between distal DNA sites results from interactions mediated, for instance,  
64 by diffusing cognate bridging molecules, such as Transcription Factors, or from direct  
65 interactions produced, e.g., by DNA bound histone molecules. In the Strings and Binders (SBS)  
66 model<sup>42,44</sup>, for example, a chromatin filament is represented as a self-avoiding chain of beads,  
67 along which are located different types of binding sites for cognate diffusing binders that can  
68 bridge those sites. The binding sites have been correlated to different molecular and  
69 epigenetic factors, ranging from active and poised Pol-II to eu- and heterochromatin  
70 sites<sup>21,27,28,45</sup>. The steady-state 3D conformations of the system are determined by the laws  
71 of physics and fall in different structural classes corresponding to its thermodynamics phases.  
72 In the SBS model, for instance, upon increasing the concentration or affinity of binders, the  
73 system undergoes a polymer phase-separation transition from a coil, i.e., randomly folded, to  
74 a globular state, where distinct globules self-assemble along the chain by the interactions of  
75 cognate binding sites<sup>24,27,35,44</sup>. Polymer physics explains that thermodynamic phases are  
76 independent of the specific origin of the interactions - e.g., direct or mediated by diffusing  
77 factors - so different models can belong to the same universality class<sup>62</sup>. For that reason, the

78 thermodynamic phases of, say, the SBS model also occur in models with direct chromatin  
79 interactions. Those phase transitions result in structural changes of the chain that  
80 spontaneously establish contact or segregation of specific, distal sites, such as genes and their  
81 regulators. Such a class of models has been shown to explain Hi-C, SPRITE, GAM and  
82 microscopy contact data across the genome, from the sub-TAD to chromosomal scales<sup>21–30,32–</sup>  
83 <sup>38,41–45</sup>, also at the single molecule level<sup>35,38</sup>.

84  
85 It is unclear, however, how loop-extrusion and polymer phase-separation perform relative to  
86 each other in capturing chromatin folding and whether they compete or co-exist in  
87 establishing chromosome architecture. Here, we implemented different versions of those  
88 models to benchmark their structural predictions at the single-molecule level against  
89 independent multiplexed FISH data<sup>6</sup>. We simulated first a simple loop-extrusion (LE) model<sup>20</sup>  
90 of the considered loci. Next, we developed an extended LE (eLE) model whose anchor site  
91 genomic locations are optimized to best fit experimental contact data. Additionally, to mimic  
92 epigenetic differences of single cells, in the model the anchor sites can differ across single  
93 molecules<sup>29</sup>. We also considered the SBS model of the studied loci<sup>35</sup> and, finally, we  
94 introduced a model combining eLE and SBS (the LE+SBS model), i.e., a model where in a single  
95 molecule both LE and SBS mechanisms act simultaneously. We find that both loop-extrusion  
96 and phase-separation based models can explain well ensemble-averaged microscopy and  
97 bulk Hi-C data, albeit the simple LE model is only partially effective. Our single-molecule  
98 analyses show that both types of models do capture the main features of single-cell chromatin  
99 conformations and higher-order contacts. Yet, phase-separation based models better reflect  
100 the experimentally reported segregation in globules of the considered genomic loci and their  
101 cell-to-cell structural variability. Such a variability results from two main concurrent sources:  
102 the intrinsic thermodynamic degeneracy of polymer folding and single-cell epigenetic  
103 heterogeneity. Consistent with such a picture, the LE+SBS model turns out to provide overall  
104 an excellent description of all the different datasets and to have the least discrepancy with  
105 microscopy triple contact data, supporting the view that loop-extrusion and phase-separation  
106 can co-exist at the single-molecule level in determining chromatin architecture.

107

## 108 **RESULTS**

### 109 **Polymer models of the studied loci**

110 We implemented the polymer models of two 2Mb wide loci in human IMR90 and HCT116  
111 cells where, as stated, single-cell super-resolution microscopy data<sup>6</sup> are available at 30kb  
112 resolution (**Fig. 1a**, **Suppl. Fig. 1a**). To assess the role of the different ingredients of the  
113 models, we developed distinct versions that we compared against single-cell data.

114

115 First, we implemented a simple LE model<sup>20</sup>, where loop-extruding motors stochastically bind  
116 to a polymer bead chain and extrude loops until encountering anchor points with opposite  
117 orientation or another motor or unbinding from the chain (**Fig. 1b** and **Methods**). The position  
118 and orientation of the anchor points are identified by the FIMO standard motif finding  
119 analysis<sup>63</sup> based on the peaks of CTCF ChIP-seq data from ENCODE<sup>64</sup>. While the motors can  
120 stochastically bind to and unbind from the chain, the anchor sites are fixed and equal in all  
121 single-molecule computer simulations. Their anchoring strength is set to 100%, i.e., when an  
122 extruder arrives at an anchor point it remains blocked at that position, yet we checked that  
123 the overall results do not change for strengths in the range down to 60% (**Methods**). This

124 model is hereafter referred to as the LE model. To explore the potential of the loop-extrusion  
125 mechanism beyond such a minimal implementation, we also considered a more refined  
126 version where, to mimic epigenetic differences across single cells, each anchor site is present,  
127 with a given probability, only in a subset of model single-molecules<sup>29</sup> (**Fig. 1c, Suppl. Fig. 1b**  
128 and **Methods**). Additionally, to best reproduce population-averaged Hi-C and microscopy  
129 distance data, we searched for the optimal genomic location and probability of the motor  
130 anchor sites, independently of CTCF tracks (**Methods**). In the considered loci, most of those  
131 optimal sites coincide with FIMO CTCF peaks (**Fig. 1c, Suppl. Fig. 1b**), but not all, and  
132 conversely many FIMO CTCF peaks are not included as model anchor sites. The probability to  
133 be present in a model single-molecule is found to be different for different anchor sites,  
134 ranging from roughly 50% to 100% (**Fig. 1c, Suppl. Fig. 1b**), values consistent with current  
135 estimates of cell epigenetic heterogeneity<sup>65</sup>. Finally, to better fit the features of Hi-C and  
136 microscopy data, such as TADs and globules (see below), the beads of the polymer chain are  
137 subject to a self-interaction produced by unspecific bridging molecules. Such a variant of the  
138 LE model is hereafter named the extended LE (in short, eLE).

139  
140 Next, in the considered loci we implemented the SBS model<sup>35</sup> whereby chromatin is  
141 represented as a self-avoiding chain of beads, in a thermal bath, with specific binding sites for  
142 cognate diffusing molecular binders (**Fig. 1d, Suppl. Fig. 1c** and **Methods**). The location and  
143 types of binding sites are different for the different loci and are inferred via a machine learning  
144 procedure based on the PRISMR method, which takes as input only Hi-C data<sup>28,35</sup>. The model  
145 of the HCT116 locus has four binding site types and the model of the IMR90 locus has seven  
146 types, each visually represented by a different color along the chain (**Fig. 1d, Suppl. Fig. 1c**).  
147 The binding site types have been shown to correlate with different combinations of chromatin  
148 architectural factors, such as CTCF/Cohesin, H3K4me3 or H3K4me1<sup>35</sup>. As mentioned above,  
149 the equilibrium 3D conformations of the SBS model fall in structural classes corresponding to  
150 its thermodynamics phases<sup>62</sup>: upon increasing binder concentration or affinity above a  
151 threshold value, the system undergoes a phase transition from a coil (i.e., randomly folded)  
152 to a polymer phase-separated state where distinct, compact globules self-assemble along the  
153 chain in correspondence of its different, prevailing binding domains (i.e., locally enriched  
154 colors)<sup>35</sup>. The intrinsic thermodynamic degeneracy of the states of the model results in a  
155 broad variety of 3D single-molecule conformations<sup>35</sup> (**Methods**). We also developed a variant  
156 of the SBS model where cognate DNA sites have direct physical interactions, rather than  
157 mediated by binders, and our overall findings remain unchanged (**Suppl. Fig. 2, Methods**) as  
158 expected from Statistical Mechanics<sup>62</sup>.

159  
160 Finally, to check whether active mechanisms, such as loop-extrusion, and passive  
161 mechanisms, such as thermodynamic polymer phase-separation, could coexist to shape  
162 chromatin architecture in the studied loci, we implemented a polymer model combining the  
163 above described eLE and SBS models, i.e., a model where both mechanisms act  
164 simultaneously in each single molecule (named the LE+SBS model, **Fig. 1e, Suppl. Fig. 1d** and  
165 **Methods**). For each of the considered models, an ensemble of 3D conformations was  
166 obtained via Molecular Dynamics simulations in the steady state<sup>29,35</sup> (**Methods**). In all the  
167 considered cases the model unit length scale was mapped into physical units by equating the  
168 median gyration radius to its corresponding experimental counterpart<sup>6,35</sup> (**Suppl. Fig. 3,**  
169 **Methods**).

170 **Both loop-extrusion and phase-separation based models recapitulate average microscopy**  
171 **and Hi-C data**

172 To benchmark the different models, we focused first on how they recapitulate population-  
173 averaged experimental data by comparing their median distance and contact maps against,  
174 respectively, multiplexed FISH<sup>6</sup> and bulk Hi-C data<sup>15,60</sup>.

175  
176 In our IMR90 case study locus, we found that the models all capture the global patterns visible  
177 in the median distance matrix<sup>6</sup> (**Fig. 2a, Methods**). To have a quantitative measure of  
178 similarity, we computed the genomic distance-corrected Pearson correlation coefficient,  $r'$ ,  
179 between model and experiment. The LE has the lowest  $r'$  ( $r'=0.19$ ), while the eLE has  $r'=0.49$ ,  
180 highlighting a markedly improved similarity to the experiment. The data appear to be better  
181 captured by the SBS and by the LE+SBS models, as signaled by their higher correlations  
182 ( $r'=0.77$  and  $r'=0.70$ , respectively). Analogous results are found by comparing the model  
183 contact matrices against Hi-C data<sup>15</sup> (**Fig. 2b, Methods**): LE has the lowest correlation  
184 ( $r'=0.24$ ), eLE has  $r'=0.57$ , while SBS and LE+SBS models comparatively better reproduce Hi-C  
185 contact patterns ( $r'=0.74$  and  $r'=0.72$ , respectively). We also considered other measures of  
186 similarity, such as the simple Pearson correlation (**Suppl. Table I**), which provided analogous  
187 results.

188  
189 Next, we focused on the relative distances of specific, interesting pairs of sites in the IMR90  
190 locus (**Suppl. Table II**). We considered: (i) a pair of sites (green, **Fig. 2c** and **Suppl. Table II**)  
191 located 0.3Mb apart from each other within the same TAD, having a strong interaction; (ii) a  
192 pair of sites (red), located 0.7Mb away in different sub-TADs, having a strong loop contact in  
193 the median distance matrix; and (iii) a pair of 1.1Mb distant sites (yellow) from different TADs,  
194 separated by a strong TAD boundary. Albeit the genomic separation of the red pair is twice  
195 as large than the separation of the green, those pairs have a similar average distance in the  
196 experiment, close to 400nm, whereas the boundary separated yellow pair is more than  
197 800nm apart (**Fig. 2c, Suppl. Table II**). We found that the different models all recapitulate  
198 those values (**Fig. 2c, Suppl. Table II**) and, interestingly, the LE+SBS model is overall the closest  
199 to the experiment across those specific pairs of sites. Additionally, we checked that the  
200 distance distributions derived from the models are all similar to the corresponding  
201 microscopy distance distributions (**Suppl. Fig. 4**). We stress, however, that the specific values  
202 of those distances can depend on the minute details of the models, such as the shape of the  
203 interaction potential or loop-extruder size, so the agreement could be further improved.

204  
205 To assess how well distinct models capture different aspects of chromatin folding, we also  
206 computed the probability to find a TAD boundary at a given genomic location and the average  
207 separation score<sup>6</sup> along the locus in single-molecule conformations (**Fig. 2d,e, Methods**). In  
208 the IMR90 case study locus, we found that the boundary probability and the boundary  
209 strength averaged over all genomic positions are similar across the different models and very  
210 close to the experimental values (**Suppl. Fig. 5**). The boundary probability as a function of the  
211 genomic coordinates of the locus, however, is better captured by the eLE model, which has  
212 the highest Pearson correlation with experimental data ( $r=0.83$ , **Fig. 2d**), while the LE has the  
213 lowest correlation ( $r=0.31$ ). The SBS and LE+SBS models also provide a good fit to the data,  
214 having respectively  $r=0.63$  and  $r=0.65$ . We also found that all the models provide a good  
215 overall description of the average separation score along the locus (**Fig. 2e**): the LE has the



216 lowest correlation to the corresponding experimental data ( $r=0.51$ ), the eLE has  $r=0.74$ , the  
217 SBS  $r=0.79$  and the LE+SBS model  $r=0.82$ .

218

219 Our analysis of the HCT116 locus returned a very similar picture about the performance of  
220 the different models to describe average distance and Hi-C data (**Suppl. Fig. 6a, b**) as well as  
221 TAD boundary probabilities and separation scores (**Suppl. Fig. 6c, d and Suppl. Fig. 7**).

222

223 Taken together, our results show that both loop-extrusion and phase-separation based  
224 models are consistent with ensemble-averaged microscopy and bulk Hi-C data. While the LE  
225 model is only partially effective, the eLE, which incorporates a single-molecule variability of  
226 optimized anchor sites, works well in the description of those data and is the best to  
227 recapitulate the TAD boundary probability function. However, polymer models including  
228 globule phase-separation mechanisms (SBS and LE+SBS) have overall higher correlation  
229 values with average microscopy distance and Hi-C contact data, and better capture some local  
230 features of chromatin folding, such as the separation score.

### 231 **The models are overall consistent with chromatin structure at the single-molecule level**

232 To compare how the different models describe chromatin structure at the single-molecule  
233 level we took advantage of the mentioned super-resolution microscopy data<sup>6</sup> and of the  
234 ensemble of polymer 3D conformations produced via our computer simulations.

235

236 First, we checked how well each model represents single-cell chromatin conformations by  
237 performing an all-against-all comparison of single-molecule imaged and model 3D structures.  
238 We used a method<sup>35,66</sup> whereby each 3D conformation from microscopy data is univocally  
239 associated to a corresponding model structure (for each considered type of model) by  
240 searching for the least root mean square deviation (RMSD) of their coordinates (**Fig. 3a, Suppl.**  
241 **Fig. 10a and Methods**). To test the statistical significance of the association, we compared  
242 the RMSD distribution of the best-matching experiment-model pairs against a simple control  
243 case where the RMSD distribution is computed between random pairs of imaged structures.  
244 We verified that for each of the considered polymer models the RMSD distribution of the  
245 best-matching pairs is statistically different from the control in both the IMR90 and HCT116  
246 loci (**Fig. 3b and Suppl. Fig. 8a**, two-sided Mann–Whitney test  $p$ -value = 0). Quantitatively, in  
247 the IMR90 locus we found, consistently across the models, that less than 5% of the former  
248 distribution is above the first decile of the control (**Fig. 3c**) and, in particular, the SBS model  
249 performs slightly better than the others. The analysis of the models of the HCT116 locus  
250 returned similar results (**Suppl. Fig. 8b**). As an additional test, we also considered a more  
251 stringent control where the RMSD is computed only between pairs of imaged structures  
252 having overall similar distance matrices, i.e., with a corresponding genomic distance-  
253 corrected correlation larger than 0.5 (i.e., with  $r' > 0.5$ , see below), and we found analogous  
254 results (**Suppl. Fig. 9**). Hence, the model conformations best matching the experimental  
255 structures have a statistically significant RMSD distribution and provide a non-trivial  
256 description of chromatin molecules in single cells (**Fig. 3a, Suppl. Fig. 10a**).

257

258 Next, we tested whether the variability of the ensemble of model single-molecule structures  
259 reflects the experimentally observed variability of chromatin single-cell conformations<sup>6</sup>. In  
260 the IMR90 locus, for example, the distribution of  $r'$  correlations between pairs of  
261 experimental single structure distance matrices has an average  $r'=0.23$  and a variance equal

262 to 0.18 (**Fig. 3d**), showing that while the imaged structures are broadly varying they have also  
263 a significant degree of similarity<sup>6,35</sup>. For each model, we computed the corresponding  
264 distribution of  $r'$  correlations between all model single-molecule distance matrices and we  
265 compared it with the experimental one (**Fig. 3d** and **Methods**). Interestingly, the  $r'$   
266 distributions of the different models have all a shape similar to the experiment and a similar  
267 variance, yet they have different average values (**Fig. 3d**). The LE and eLE model average  $r'$   
268 ( $r'=0.06$  and  $r'=0.04$  respectively) is significantly lower than the experimental value, showing  
269 that their single-molecule structures have a lower degree of similarity with each other than  
270 single-cell imaged chromatin conformations. The LE+SBS model has an average  $r'=0.14$ , while  
271 the SBS model has  $r'=0.23$ , which is equal to the microscopy value (**Fig. 3d**). In fact, the  $r'$   
272 distribution of the SBS model is statistically indistinguishable from the experimental  
273 distribution (two-sided Mann–Whitney test  $p$  value = 0.362), while the other models are  
274 statistically different ( $p < 0.001$ ). Additionally, we verified that analogous results are found if  
275 the experiment-experiment  $r'$  distribution is compared to the distribution of  $r'$  correlations  
276 between experiment and model single-molecule distance matrices (**Suppl. Fig. 11a**). We  
277 stress, again, that those correlation measures can depend on the minute details employed to  
278 construct the models and the agreement with the experiment could be further improved.  
279 Finally, the analysis of the HCT116 locus returns very similar results to those of the IMR90  
280 locus (**Suppl. Fig.s 10b, 11b**).

281  
282 In summary, consistent with our findings on bulk data, our single-molecule analyses support  
283 the view that the different polymer models all provide a non-trivial description of single-cell  
284 chromatin conformations. While both loop-extrusion and phase-separation based models  
285 capture the main features of chromatin single-molecules, in the studied loci we find that the  
286 latter models better reflect the microscopy observed single-molecule globular structure and  
287 variability. In particular, our analysis shows that chromatin structure variability across single  
288 cells results from two main distinct, yet concurrent sources: on the one hand from the intrinsic  
289 degeneracy of folding that we find in all the considered models, and on the other hand from  
290 the differences of anchoring points (or, analogously, binding sites) in single-molecules,  
291 representing the epigenetic heterogeneity of single cells.

## 292 **The models well reproduce microscopy triple contact data**

293 To assess how well the different models capture higher-order contacts, we investigated their  
294 predicted average triplet contact probability matrix, which we compared to microscopy data<sup>6</sup>  
295 (**Methods**). We focused on triplets formed by six different genomic viewpoints roughly  
296 equally spaced along the IMR90 locus that correspond to some main TAD boundaries and  
297 loops of the pairwise median distance matrix (**Fig. 4** and **Suppl. Fig. 12**). In our analysis, by  
298 definition, a triplet is formed if three genomic sites have all their pairwise distances below a  
299 threshold value. The triplet probability depends on such a threshold, but we checked that the  
300 measured values are proportionally conserved if the threshold is varied around 150nm in a  
301 range from 100 to 200nm (**Methods**).

302  
303 Microscopy data reveal that triplets are typically compartmentalized in the studied loci and  
304 restricted to the TAD encompassing each of the selected viewpoints (**Fig. 4a-c** and **Suppl. Fig.**  
305 **12**), showing that TADs tend to create local environments where also multiple contacts  
306 become enriched. The different polymer models do capture experimental triplet patterns  
307 across all the considered viewpoints. To quantitatively assess the similarity between

308 experiment and model predicted triplets, we computed the mean relative squared difference  
309 (MRSD) between the corresponding entries of the two matrices over the studied viewpoints  
310 (**Fig. 4d, Methods**). To set a reference, we also considered the triplets formed in a random  
311 control made of self-avoiding-walk (SAW) polymer chains having the same number of beads  
312 and gyration radius (i.e., linear size) as the real images of the locus (**Methods**). Our analysis  
313 shows that the LE model has an MRSD with the experiment that is one third of the random  
314 control value, yet it has the largest discrepancy with the experiment compared to the other  
315 considered models, whose MRSD is at least one order of magnitude smaller than the control.  
316 Interestingly, the LE+SBS model has the lowest distance from the experiment and its MRSD is  
317 statistically different from both the LE, the SBS and control case (**Fig. 4d**, two-sided Welch's t-  
318 test  $p < 0.001$ ), whereas it is statistically equal to the eLE MRSD (two-sided Welch's t-test  
319  $p = 0.097$ ).

320  
321 Taken together, our results show that both loop-extrusion and phase-separation mechanisms  
322 can explain higher-order contacts. However, a model combining both mechanisms (LE+SBS)  
323 turns out to have the least discrepancy with microscopy triplet data and overall provides an  
324 excellent description of all the different experimental datasets considered, supporting the  
325 view that loop-extrusion and phase-separation can co-exist in single-molecules in establishing  
326 chromatin architecture.

## 327 **DISCUSSION**

328 To investigate the physical mechanisms that shape chromatin 3D large scale organization, we  
329 explored via Molecular Dynamics simulations two classes of polymer models where folding is  
330 based on two distinct physical processes: DNA loop-extrusion and polymer phase-separation,  
331 recapitulated respectively by the LE and by the SBS models (**Fig. 1**). We assessed how they  
332 perform relative to each other in capturing chromatin bulk Hi-C contact<sup>15,60</sup> and single-  
333 molecule microscopy data<sup>6</sup> in human IMR90 and HCT116 cells, and we exploited such data to  
334 establish whether those mechanisms compete or coexist in single cells.

335  
336 We considered, first, a simple loop-extrusion (LE) model<sup>20</sup> of those loci (**Fig. 1b**). Next, we  
337 introduced an extended version of the LE (named eLE, **Fig. 1c**), where the genomic locations  
338 of the extruding motor anchor sites are optimized, independently of CTCF peaks, to best  
339 reproduce population-averaged experimental data. Additionally, to mimic epigenetic  
340 differences among single cells, each of those anchor sites has a specific probability to be  
341 present in a model single molecule<sup>29</sup>. The probability values returned by the optimization  
342 search range from 50% to 100%, consistent with current estimates of cell epigenetic  
343 heterogeneity<sup>65</sup>. Interestingly, most anchor sites of the optimal eLE model are found to  
344 coincide with CTCF peaks (**Fig. 1c**), but not all, and conversely many CTCF peaks are not taken  
345 as anchor sites, hinting that CTCF may be combined with other signals in anchoring loop-  
346 extruding motors<sup>67</sup>. Considering the basic ingredients that inform the LE model, we find that  
347 it performs well to fit experimental data. Yet, the eLE model better recapitulates average  
348 microscopy and Hi-C data and higher order contacts in single-molecules.

349  
350 We also considered the SBS model of the studied loci (**Fig. 1d**), i.e., a model where the  
351 attraction between cognate binding sites on the polymer chain and their associated binding  
352 molecules drives a micro-phase-separation of the chain in distinct globules<sup>35</sup>. For  
353 completeness, we checked that a model with direct interactions between binding sites (rather



354 than mediated by diffusing binders) has behaviors analogous to the SBS. Finally, we  
355 introduced a model combining the molecular elements of the eLE and of the SBS (the LE+SBS  
356 model) where in a single molecule both the LE and SBS mechanisms act simultaneously (**Fig.**  
357 **1e**). We find that the SBS and LE+SBS models explain well bulk Hi-C and single-molecule  
358 microscopy data, and reflect the experimentally reported chromatin segregation in globules  
359 and its cell-to-cell structural variability more accurately than the LE or eLE models.

360  
361 Importantly, a further optimization of the model fine details, such as the employed specific  
362 interaction potentials (shape, depth, distance of the potential minimum, etc.) or the specific  
363 nature of the modelled DNA extruding motors (size, speed, directionality, etc.), can on one  
364 hand improve even more the model agreement with experiments and on the other hand  
365 provide additional mechanistic information. Nevertheless, the models here investigated  
366 perform well considering their simplicity (**Fig.s 2-4**). In particular, the LE+SBS model returns  
367 an overall excellent description of the different datasets and the least discrepancy with  
368 microscopy triplet data, showing that loop-extrusion and phase-separation can co-exist in  
369 shaping the complex chromatin architecture of the studied loci. Our analyses also illustrate  
370 that the experimentally observed structural variability of chromatin in single-cells is  
371 consistent with two main co-existing sources of noise, i.e., the heterogeneity of single-cell  
372 epigenetics and, interestingly, an intrinsic conformational degeneracy, as chromatin can  
373 dynamically fold in many different conformations rather than in a single naïve structure as  
374 usual proteins.

375  
376 While other folding mechanisms are likely to contribute to the organisation of the genome  
377 (such as heterochromatin adsorption to the lamina), one can speculate on why different  
378 molecular processes could cooperate in determining chromatin folding. Beyond ensuring  
379 redundancy in regulation, they appear to be more effective in implementing complementary  
380 tasks. For instance, loop-extrusion is particularly suited to establish TAD borders and  
381 pointwise strong loop interactions, whereas globule phase separation can better act to  
382 segregate different regions and to form more stable (i.e., with lower variability) and hence  
383 more reproducible regulatory structures. Additionally, while loop-extrusion requires energy  
384 consumption, phase transitions are sustained by the thermal bath, and they are robust and  
385 reversible processes as the system only needs, e.g., to set an above threshold concentration  
386 (or affinity) of binders, with no need of fine tuning their number (or strength).

387

388 REFERENCES

- 389 1. Bickmore, W. A. & Van Steensel, B. Genome architecture: Domain organization of  
390 interphase chromosomes. *Cell* (2013) doi:10.1016/j.cell.2013.02.001.
- 391 2. Sexton, T. & Cavalli, G. The role of chromosome domains in shaping the functional  
392 genome. *Cell* vol. 160 (2015).
- 393 3. Quinodoz, S. A. *et al.* Higher-Order Inter-chromosomal Hubs Shape 3D Genome  
394 Organization in the Nucleus. *Cell* **174**, 744–757.e24 (2018).
- 395 4. Boettiger, A. N. *et al.* Super-resolution imaging reveals distinct chromatin folding for  
396 different epigenetic states. *Nature* **529**, 418–422 (2016).
- 397 5. Cattoni, D. I. *et al.* Single-cell absolute contact probability detection reveals  
398 chromosomes are organized by multiple low-frequency yet specific interactions. *Nat.*  
399 *Commun.* **8**, 1753 (2017).
- 400 6. Bintu, B. *et al.* Super-resolution chromatin tracing reveals domains and cooperative  
401 interactions in single cells. *Science* (80-. ). (2018) doi:10.1126/science.aau1783.
- 402 7. Dekker, J. & Mirny, L. The 3D Genome as Moderator of Chromosomal  
403 Communication. *Cell* (2016) doi:10.1016/j.cell.2016.02.007.
- 404 8. Dixon, J. R., Gorkin, D. U. & Ren, B. Chromatin Domains: The Unit of Chromosome  
405 Organization. *Mol. Cell* **62**, 668–680 (2016).
- 406 9. Krijger, P. H. L. & De Laat, W. Regulation of disease-associated gene expression in the  
407 3D genome. *Nature Reviews Molecular Cell Biology* vol. 17 (2016).
- 408 10. Spielmann, M., Lupiáñez, D. G. & Mundlos, S. Structural variation in the 3D genome.  
409 *Nat. Rev. Genet.* **19**, 453–467 (2018).
- 410 11. Finn, E. H. & Misteli, T. Molecular basis and biological function of variability in spatial  
411 genome organization. *Science* (80-. ). **365**, eaaw9498 (2019).
- 412 12. Kempfer, R. & Pombo, A. Methods for mapping 3D chromosome architecture. *Nature*  
413 *Reviews Genetics* vol. 21 (2020).
- 414 13. Lieberman-Aiden, E. *et al.* Comprehensive mapping of long-range interactions reveals  
415 folding principles of the human genome. *Science* (80-. ). (2009)  
416 doi:10.1126/science.1181369.
- 417 14. Beagrie, R. A. *et al.* Complex multi-enhancer contacts captured by genome  
418 architecture mapping. *Nature* (2017) doi:10.1038/nature21411.
- 419 15. Rao, S. S. P. *et al.* A 3D map of the human genome at kilobase resolution reveals  
420 principles of chromatin looping. *Cell* (2014) doi:10.1016/j.cell.2014.11.021.
- 421 16. Dixon, J. R. *et al.* Topological domains in mammalian genomes identified by analysis  
422 of chromatin interactions. *Nature* (2012) doi:10.1038/nature11082.
- 423 17. Nora, E. P. *et al.* Spatial partitioning of the regulatory landscape of the X-inactivation  
424 centre. *Nature* (2012) doi:10.1038/nature11049.
- 425 18. Fraser, J. *et al.* Hierarchical folding and reorganization of chromosomes are linked to  
426 transcriptional changes in cellular differentiation. *Mol. Syst. Biol.* (2015)  
427 doi:10.15252/msb.20156492.
- 428 19. Sanborn, A. L. *et al.* Chromatin extrusion explains key features of loop and domain  
429 formation in wild-type and engineered genomes. *Proc. Natl. Acad. Sci. U. S. A.* **112**,  
430 (2015).
- 431 20. Fudenberg, G. *et al.* Formation of Chromosomal Domains by Loop Extrusion. *Cell Rep.*  
432 (2016) doi:10.1016/j.celrep.2016.04.085.

- 433 21. Jost, D., Carrivain, P., Cavalli, G. & Vaillant, C. Modeling epigenome folding: Formation  
434 and dynamics of topologically associated chromatin domains. *Nucleic Acids Res.*  
435 (2014) doi:10.1093/nar/gku698.
- 436 22. Zhang, B. & Wolynes, P. G. Topology, structures, and energy landscapes of human  
437 chromosomes. *Proc. Natl. Acad. Sci. U. S. A.* **112**, (2015).
- 438 23. Brackley, C. A. *et al.* Predicting the three-dimensional folding of cis-regulatory regions  
439 in mammalian genomes using bioinformatic data and polymer models. *Genome Biol.*  
440 **17**, (2016).
- 441 24. Chiariello, A. M., Annunziatella, C., Bianco, S., Esposito, A. & Nicodemi, M. Polymer  
442 physics of chromosome large-scale 3D organisation. *Sci. Rep.* (2016)  
443 doi:10.1038/srep29775.
- 444 25. Di Stefano, M., Paulsen, J., Lien, T. G., Hovig, E. & Micheletti, C. Hi-C-constrained  
445 physical models of human chromosomes recover functionally-related properties of  
446 genome organization. *Sci. Rep.* **6**, (2016).
- 447 26. Di Pierro, M., Zhang, B., Aiden, E. L., Wolynes, P. G. & Onuchic, J. N. Transferable  
448 model for chromosome architecture. *Proc. Natl. Acad. Sci.* **113**, 12168–12173 (2016).
- 449 27. Barbieri, M. *et al.* Active and poised promoter states drive folding of the extended  
450 HoxB locus in mouse embryonic stem cells. *Nat. Struct. Mol. Biol.* (2017)  
451 doi:10.1038/nsmb.3402.
- 452 28. Bianco, S. *et al.* Polymer physics predicts the effects of structural variants on  
453 chromatin architecture. *Nat. Genet.* (2018) doi:10.1038/s41588-018-0098-8.
- 454 29. Buckle, A., Brackley, C. A., Boyle, S., Marenduzzo, D. & Gilbert, N. Polymer Simulations  
455 of Heteromorphic Chromatin Predict the 3D Folding of Complex Genomic Loci. *Mol.*  
456 *Cell* **72**, (2018).
- 457 30. Shi, G., Liu, L., Hyeon, C. & Thirumalai, D. Interphase human chromosome exhibits out  
458 of equilibrium glassy dynamics. *Nat. Commun.* (2018) doi:10.1038/s41467-018-  
459 05606-6.
- 460 31. Brackley, C. A. *et al.* Nonequilibrium Chromosome Looping via Molecular Slip Links.  
461 *Phys. Rev. Lett.* **119**, 138101 (2017).
- 462 32. Nuebler, J., Fudenberg, G., Imakaev, M., Abdennur, N. & Mirny, L. A. Chromatin  
463 organization by an interplay of loop extrusion and compartmental segregation. *Proc.*  
464 *Natl. Acad. Sci. U. S. A.* **115**, (2018).
- 465 33. Bianco, S. *et al.* Modeling Single-Molecule Conformations of the HoxD Region in  
466 Mouse Embryonic Stem and Cortical Neuronal Cells. *Cell Rep.* (2019)  
467 doi:10.1016/j.celrep.2019.07.013.
- 468 34. Chiariello, A. M. *et al.* A Dynamic Folded Hairpin Conformation Is Associated with  $\alpha$ -  
469 Globin Activation in Erythroid Cells. *Cell Rep.* (2020)  
470 doi:10.1016/j.celrep.2020.01.044.
- 471 35. Conte, M. *et al.* Polymer physics indicates chromatin folding variability across single-  
472 cells results from state degeneracy in phase separation. *Nat. Commun.* (2020)  
473 doi:10.1038/s41467-020-17141-4.
- 474 36. Plewczynski, D. & Kadlof, M. Computational modelling of three-dimensional genome  
475 structure. *Methods* vols 181–182 (2020).
- 476 37. Bianco, S. *et al.* Computational approaches from polymer physics to investigate  
477 chromatin folding. *Current Opinion in Cell Biology* (2020)  
478 doi:10.1016/j.ceb.2020.01.002.
- 479 38. Fiorillo, L. *et al.* Comparison of the Hi-C, GAM and SPRITE methods using polymer

- 480 models of chromatin. *Nat. Methods* **18**, (2021).
- 481 39. Racko, D., Benedetti, F., Dorier, J. & Stasiak, A. Transcription-induced supercoiling as  
482 the driving force of chromatin loop extrusion during formation of TADs in interphase  
483 chromosomes. *Nucleic Acids Res.* **46**, (2018).
- 484 40. Banigan, E. J. & Mirny, L. A. Loop extrusion: theory meets single-molecule  
485 experiments. *Current Opinion in Cell Biology* vol. 64 (2020).
- 486 41. Nicodemi, M. & Pombo, A. Models of chromosome structure. *Current Opinion in Cell*  
487 *Biology* (2014) doi:10.1016/j.ceb.2014.04.004.
- 488 42. Nicodemi, M. & Prisco, A. Thermodynamic pathways to genome spatial organization  
489 in the cell nucleus. *Biophys. J.* (2009) doi:10.1016/j.bpj.2008.12.3919.
- 490 43. Bohn, M. & Heermann, D. W. Diffusion-driven looping provides a consistent provides  
491 a consistent framework for chromatin organization. *PLoS One* (2010)  
492 doi:10.1371/journal.pone.0012218.
- 493 44. Barbieri, M. *et al.* Complexity of chromatin folding is captured by the strings and  
494 binders switch model. *Proc. Natl. Acad. Sci.* (2012) doi:10.1073/pnas.1204799109.
- 495 45. Brackley, C. A., Taylor, S., Papantonis, A., Cook, P. R. & Marenduzzo, D. Nonspecific  
496 bridging-induced attraction drives clustering of DNA-binding proteins and genome  
497 organization. *Proc. Natl. Acad. Sci. U. S. A.* (2013) doi:10.1073/pnas.1302950110.
- 498 46. Lesne, A., Riposo, J., Roger, P., Cournac, A. & Mozziconacci, J. 3D genome  
499 reconstruction from chromosomal contacts. *Nat. Methods* **11**, (2014).
- 500 47. Tjong, H. *et al.* Population-based 3D genome structure analysis reveals driving forces  
501 in spatial genome organization. *Proc. Natl. Acad. Sci. U. S. A.* (2016)  
502 doi:10.1073/pnas.1512577113.
- 503 48. Zhang, S., Chasman, D., Knaack, S. & Roy, S. In silico prediction of high-resolution Hi-C  
504 interaction matrices. *Nat. Commun.* **10**, (2019).
- 505 49. Fudenberg, G., Kelley, D. R. & Pollard, K. S. Predicting 3D genome folding from DNA  
506 sequence with Akita. *Nat. Methods* **17**, (2020).
- 507 50. Schwessinger, R. *et al.* DeepC: predicting 3D genome folding using megabase-scale  
508 transfer learning. *Nat. Methods* **17**, (2020).
- 509 51. Wang, Y. *et al.* SPIN reveals genome-wide landscape of nuclear  
510 compartmentalization. *Genome Biol.* **22**, (2021).
- 511 52. Li, Q. *et al.* The three-dimensional genome organization of *Drosophila melanogaster*  
512 through data integration. *Genome Biol.* **18**, 145 (2017).
- 513 53. Serra, F. *et al.* Automatic analysis and 3D-modelling of Hi-C data using TADbit reveals  
514 structural features of the fly chromatin colors. *PLoS Comput. Biol.* **13**, (2017).
- 515 54. Nir, G. *et al.* Walking along chromosomes with super-resolution imaging, contact  
516 maps, and integrative modeling. *PLoS Genet.* **14**, e1007872 (2018).
- 517 55. Lin, D., Bonora, G., Yardimci, G. G. & Noble, W. S. Computational methods for  
518 analyzing and modeling genome structure and organization. *Wiley Interdiscip. Rev.*  
519 *Syst. Biol. Med.* **11**, e1435 (2018).
- 520 56. Di Stefano, M., Paulsen, J., Jost, D. & Marti-Renom, M. A. 4D nucleome modeling.  
521 *Current Opinion in Genetics and Development* vol. 67 (2021).
- 522 57. Kim, H. J. *et al.* Capturing cell type-specific chromatin compartment patterns by  
523 applying topic modeling to single-cell Hi-C data. *PLoS Comput. Biol.* **16**, (2020).
- 524 58. Marti-Renom, M. A. Benchmarking experiments with polymer modeling. *Nature*  
525 *Methods* vol. 18 (2021).
- 526 59. Qi, Y. & Zhang, B. Predicting three-dimensional genome organization with chromatin

- 527 states. *PLoS Comput. Biol.* **15**, (2019).  
528 60. Rao, S. S. P. *et al.* Cohesin Loss Eliminates All Loop Domains. *Cell* **171**, 305-320.e24  
529 (2017).  
530 61. Alberts, B. *et al.* *Molecular Biology of the Cell. Molecular Biology of the Cell* (2007).  
531 doi:10.1201/9780203833445.  
532 62. De Gennes, P. G. Scaling concepts in polymer physics. Cornell university press. *Ithaca*  
533 *N.Y.*, (1979) doi:10.1163/\_q3\_SIM\_00374.  
534 63. Grant, C. E., Bailey, T. L. & Noble, W. S. FIMO: Scanning for occurrences of a given  
535 motif. *Bioinformatics* **27**, (2011).  
536 64. Dunham, I. *et al.* An integrated encyclopedia of DNA elements in the human genome.  
537 *Nature* **489**, 57–74 (2012).  
538 65. Carter, B. & Zhao, K. The epigenetic basis of cellular heterogeneity. *Nature Reviews*  
539 *Genetics* vol. 22 (2021).  
540 66. Stevens, T. J. *et al.* 3D structures of individual mammalian genomes studied by single-  
541 cell Hi-C. *Nature* **544**, 59–64 (2017).  
542 67. Huang, H. *et al.* CTCF mediates dosage- and sequence-context-dependent  
543 transcriptional insulation by forming local chromatin domains. *Nat. Genet.* **53**, (2021).  
544 68. Kremer, K. & Grest, G. S. Dynamics of entangled linear polymer melts: A molecular-  
545 dynamics simulation. *J. Chem. Phys.* (1990) doi:10.1063/1.458541.  
546 69. Plimpton, S. Fast parallel algorithms for short-range molecular dynamics. *J. Comput.*  
547 *Phys.* (1995) doi:10.1006/jcph.1995.1039.  
548 70. Anderson, J. A., Glaser, J. & Glotzer, S. C. HOOMD-blue: A Python package for high-  
549 performance molecular dynamics and hard particle Monte Carlo simulations. *Comput.*  
550 *Mater. Sci.* **173**, (2020).  
551 71. Goloborodko, A., Marko, J. F. & Mirny, L. A. Chromosome Compaction by Active Loop  
552 Extrusion. *Biophys. J.* **110**, (2016).  
553 72. Rosa, A. & Everaers, R. Structure and dynamics of interphase chromosomes. *PLoS*  
554 *Comput. Biol.* (2008) doi:10.1371/journal.pcbi.1000153.  
555 73. Allen, M. P. & Tildesley, D. J. Computer Simulation of Liquids (Oxford Science  
556 Publications) SE - Oxford science publications. *Oxford Univ. Press* (1989).  
557 74. Theobald, D. L. Rapid calculation of RMSDs using a quaternion-based characteristic  
558 polynomial. *Acta Crystallogr. Sect. A Found. Crystallogr.* **61**, (2005).  
559



560 **ACKNOWLEDGEMENTS**

561 M.N. acknowledges support from the National Institutes of Health Common Fund 4D  
562 Nucleome Program grant 1U54DK107977-01 and 1UM1HG011585-01, EU H2020 Marie Curie  
563 ITN n.813282, CINECA ISCRA ID HP10CYFPS5 and HP10CRTY8P, Einstein BIH Fellowship Award  
564 (EVF-BIH-2016 and 2019), Regione Campania SATIN Project 2018-2020, and computer  
565 resources from INFN, CINECA, ENEA CRESCO/ENEAGRID (Iannone et al. 2019) and  
566 *Scope/ReCAS/Ibisco* at the University of Naples.

567 **AUTHOR CONTRIBUTIONS**

568 M.N., M.C and E.I. designed the project. M.N., M.C., E.I. and A.M.C. developed the modelling.  
569 M.C., E.I. and A.A. ran computer simulations and performed data analyses with help from  
570 A.M.C., S.B. and A.E.. M.N. and M.C. wrote the manuscript with input from all the authors.

571 FIGURE CAPTIONS

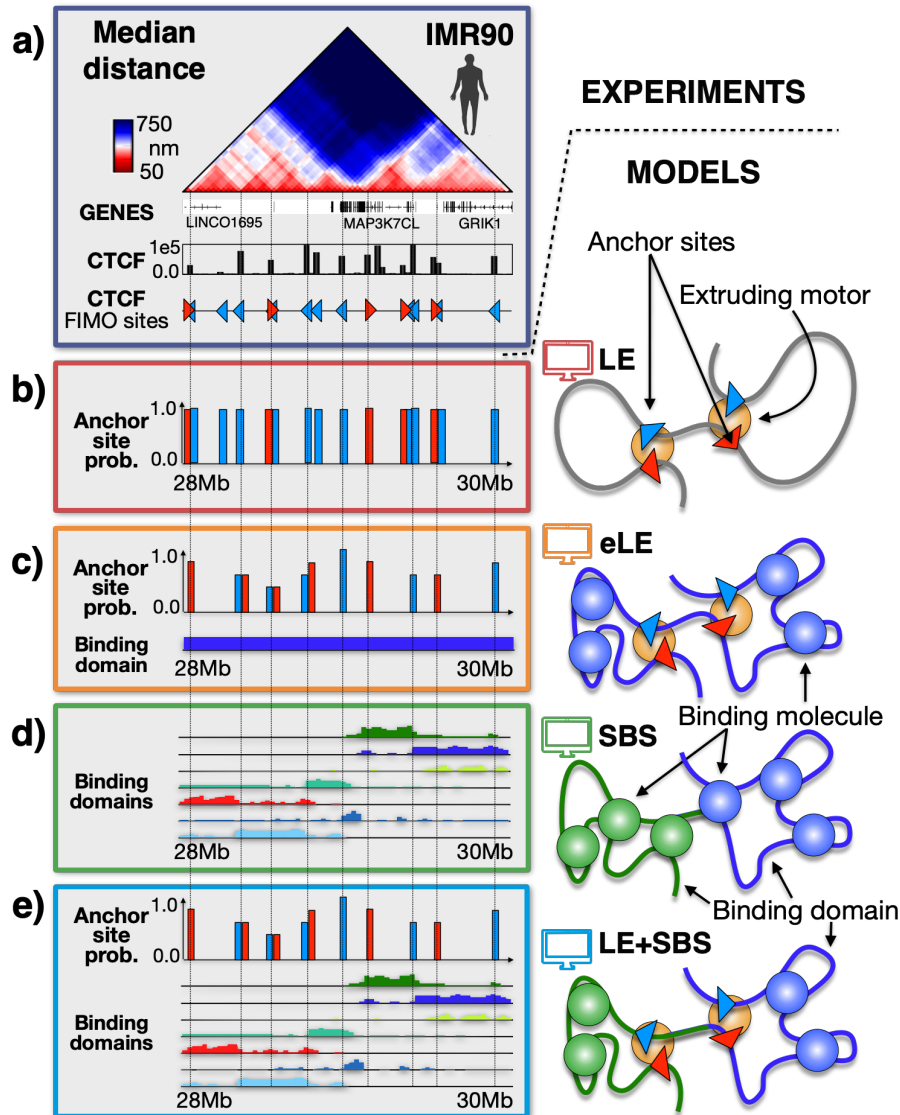

572 **Figure 1**

573 **Scheme of the investigated polymer models.** We used Molecular Dynamics simulations to  
 574 investigate polymer models where folding is based on two different physical processes: (i)  
 575 DNA loop-extrusion and (ii) polymer phase-separation, recapitulated respectively by the  
 576 LE<sup>19,20</sup> and by the SBS models<sup>42,44</sup>. **a)** Microscopy median distance<sup>6</sup> and ENCODE<sup>64</sup> CTCF data  
 577 are shown for the studied 2Mb wide locus in human IMR90 cells. **b)** We considered a simple  
 578 Loop-Extrusion (LE) model<sup>20</sup> where active motors extrude polymer loops until encountering  
 579 another motor or CTCF anchor points with opposite orientation, which are fixed and equal in  
 580 all single-molecule simulations. **c)** We also considered an extended version of the LE (eLE)  
 581 whose anchor site locations are optimized, independently of CTCF, to best reproduce Hi-C and  
 582 average microscopy data. To represent the epigenetic heterogeneity of single cells, those

583 anchor sites have a finite probability to be present in a model single molecule<sup>29</sup>. **d)** In the  
584 Strings and Binders (SBS) model<sup>35</sup> a chromatin filament is represented as a self-avoiding chain  
585 of beads including different types of binding sites (colors) for diffusing cognate binders that  
586 can bridge those sites, hence driving a micro-phase-separation of the chain in distinct  
587 globules. The binding site locations are determined by the PRISMR method and correlate with  
588 different combinations of epigenetic factors including, but not limited to, CTCF and  
589 cohesin<sup>28,35</sup>. **e)** We also considered a polymer model (LE+SBS) where in a single molecule both  
590 the eLE and SBS mechanisms act simultaneously.  
591

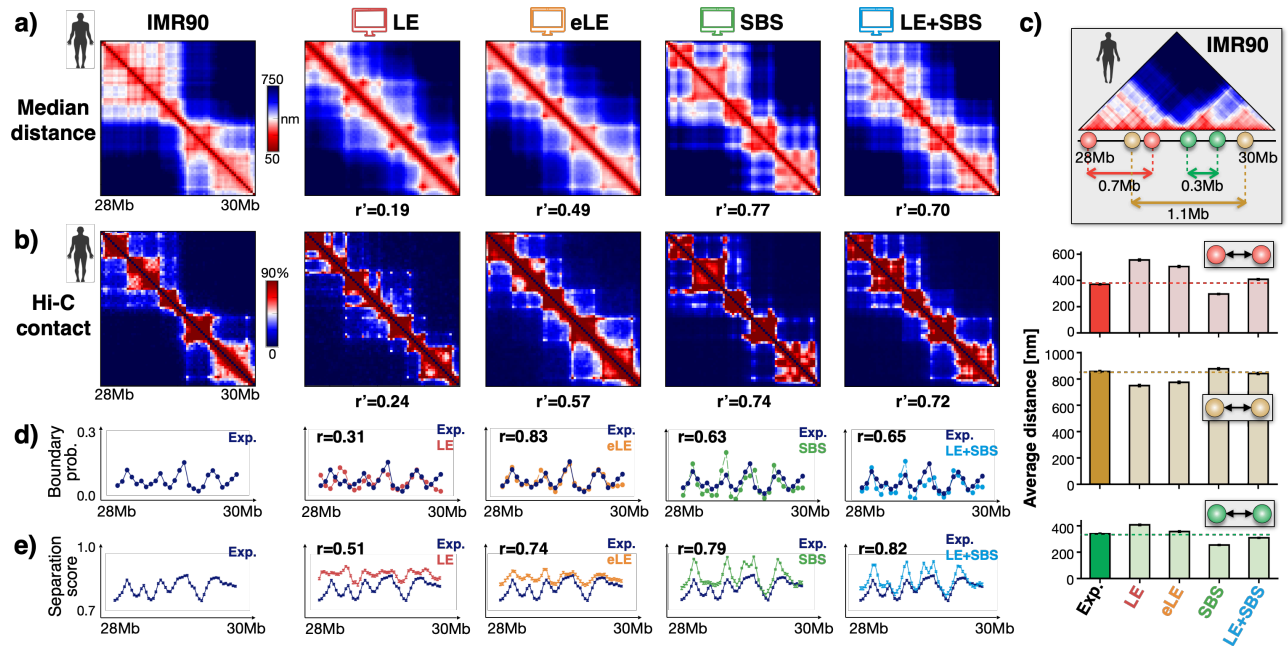

592 **Figure 2**

593 **Both loop-extrusion and phase-separation based models recapitulate bulk Hi-C and average**  
 594 **microscopy data.** **a)** In-silico median distance and **b)** average contact data are compared to  
 595 microscopy<sup>6</sup> and Hi-C<sup>15</sup> data (left) in the IMR90 locus. The different models have high genomic  
 596 distance-corrected Pearson correlations ( $r'$ ) with the experiments, particularly the eLE, SBS  
 597 and LE+SBS models. **c)** The model derived average distances are reported for specific pairs of  
 598 sites separated by TAD boundaries (yellow) or connected in loops within a TAD (green) or  
 599 across a TAD boundary (red). **d)** The average single-molecule genomic boundary probability  
 600 and **e)** the separation score are also well recapitulated by the models.  
 601

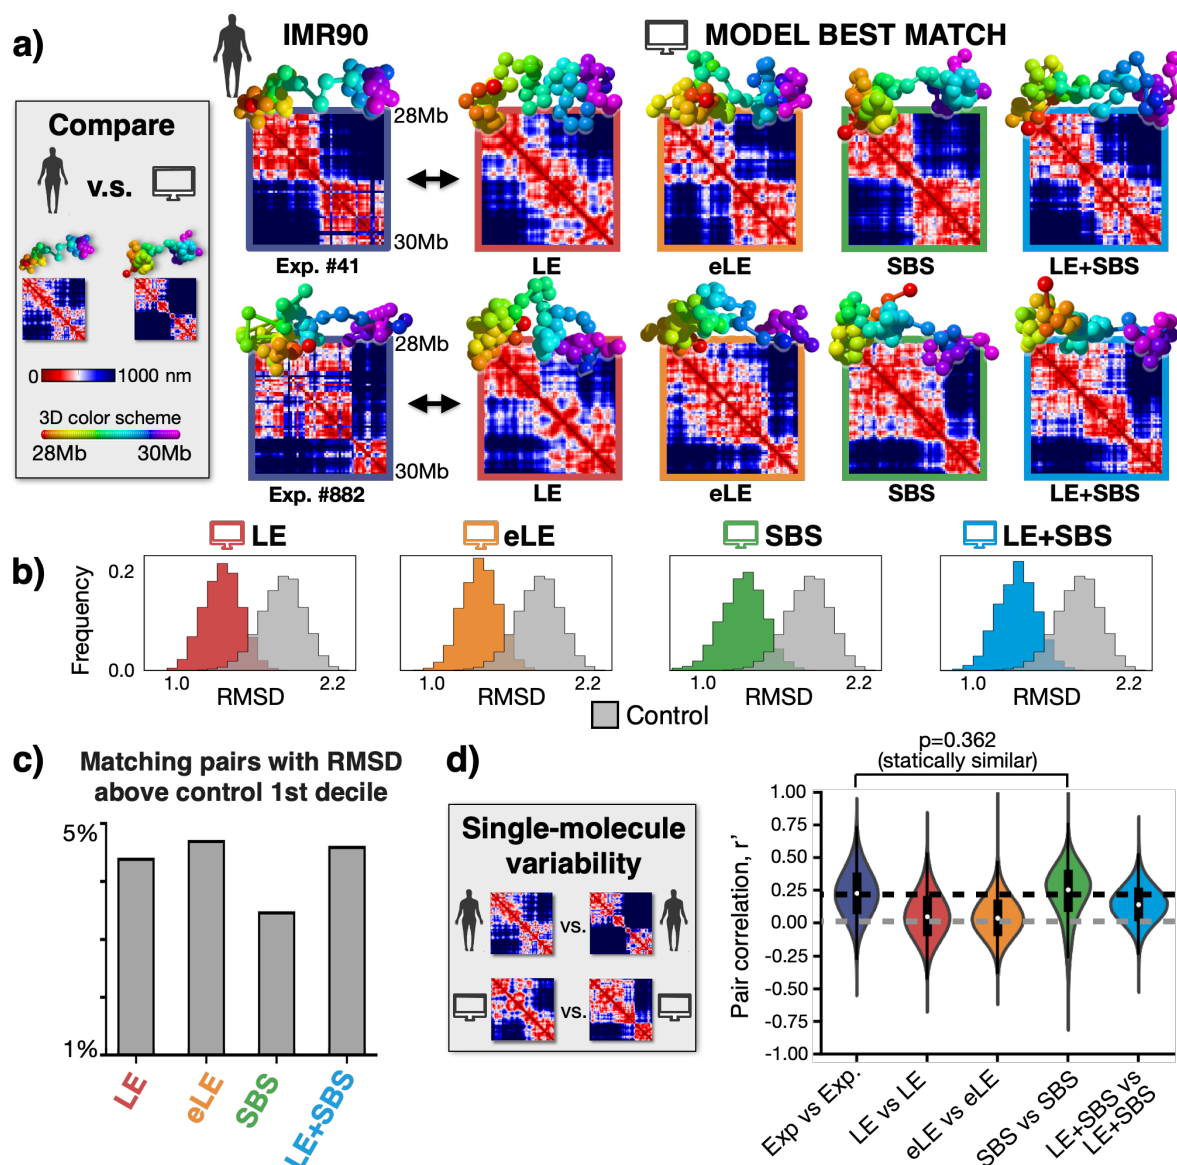

602 **Figure 3**

603 **Single-cell chromatin conformations are well captured by the models, especially by phase-**  
 604 **separation based ones.** **a)** Microscopy single-cell chromatin structures of the IMR90 locus<sup>6</sup>  
 605 (left) are associated to a best matching single-molecule conformation in each model via the  
 606 minimum RMSD criterion. Here two examples are shown. **b)** For each of the considered  
 607 polymer models, the RMSD distribution of the best-matching experiment-model pairs is  
 608 statistically different from a control RMSD distribution made of random pairs of experimental  
 609 structures (two-sided Mann–Whitney test  $p$ -value = 0). **c)** Less than 5% of best matching pairs  
 610 have an RMSD above the 1st decile of the control distribution. **d)** The variability of microscopy  
 611 single-molecule structures is measured by the distribution of  $r'$  correlations between pairs of  
 612 distance matrices and is compared to the variability of in-silico structures. The  $r'$  distribution  
 613 of the SBS model is statistically indistinguishable from the experimental one (two-sided  
 614 Mann–Whitney test  $p$ -value = 0.362).  
 615



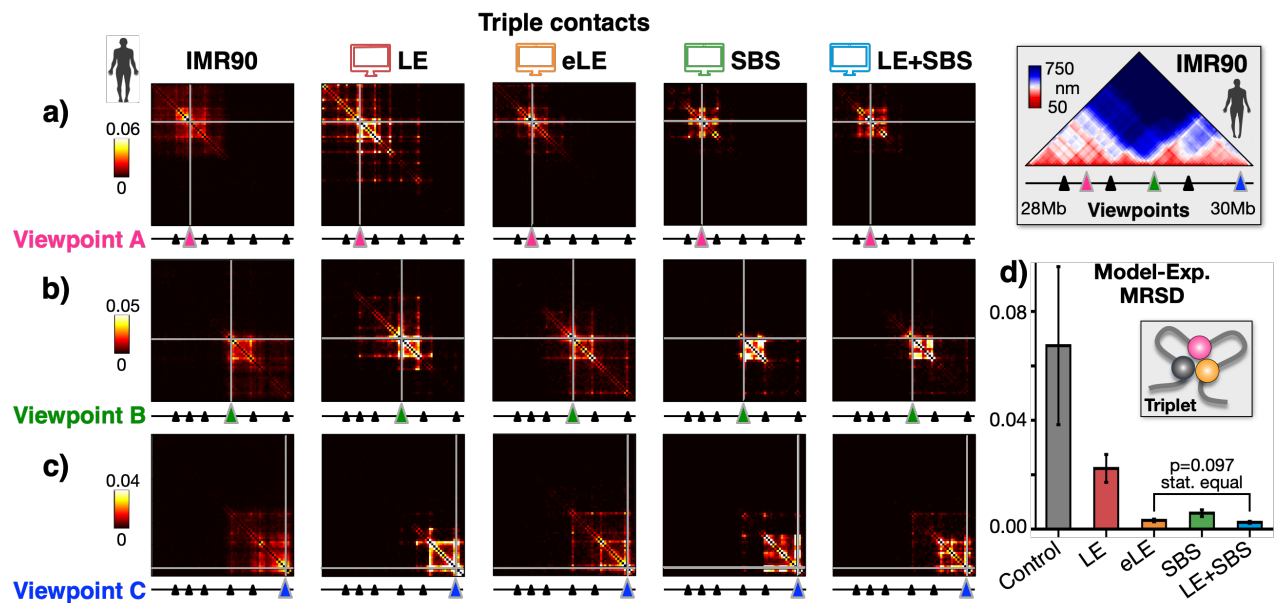

616 **Figure 4**

617 **Triple contact data are well described by the models, especially by the eLE and the LE+SBS.**  
618 Triple contact probability maps are shown in microscopy data<sup>6</sup> (left) and in the models from  
619 three different viewpoints (**a**), **b**), **c**), more viewpoints in **Suppl. Fig. 12**). **d**) The mean relative  
620 squared difference (MRSD) between imaging and model triplet contact maps is the lowest in  
621 the LE+SBS model, which is statistically equivalent to the eLE model (two-sided Welch's t-test  
622  $p=0.097$ ). Their MRSDs are, instead, statistically different from both the LE, the SBS and the  
623 control (two-sided Welch's t-test  $p<0.001$ ). The control is made of randomly folded self-  
624 avoiding polymer chains with same number of beads and size than the experimental  
625 structures.  
626
